# Supplementary material for: Synthesis of (FeCoNiCuMn) 3 O 4 spinel-high entropy oxide and green carbon from agricultural waste for supercapacitor application
Source: Royal Society of Chemistry journal article supplement (doi:10.1039/d4ra05204h), 2024-01-01
Supplement: d4ra05204h1.pdf [file d4ra05204h1.pdf]

## Synthesis of $(\text{FeCoNiCuMn})_3\text{O}_4$ spinel-High entropy oxide and, green carbon from agricultural waste for supercapacitor application.

Gobinda Chandra Mohanty<sup>1</sup>, Amlan Asish<sup>2</sup> Shubhasikha Das<sup>3</sup> Anu Verma<sup>3</sup>

<sup>1</sup>*School of Nano science and Technology, Indian Institute of Technology, Kharagpur, West Bengal India 721302.*

<sup>2</sup>*Advanced Technology Development Centre (ATDC), Indian Institute of Technology, Kharagpur, Kharagpur-721302, India.*

<sup>3</sup>*School of Environmental Science and Technology, Indian Institute of Technology, Kharagpur,*

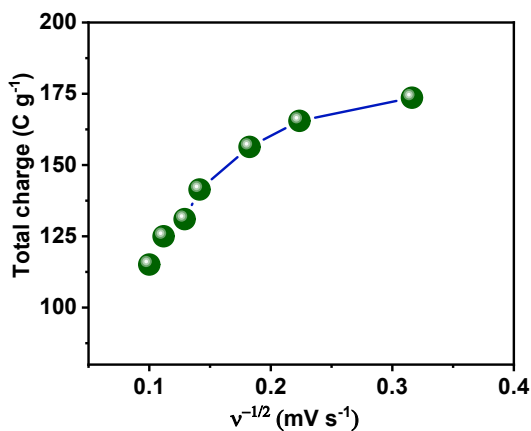

*West Bengal, India*

Figure S1: Total charge(Q) vs inverse square root of scan rate  $v^{-1/2}$ .

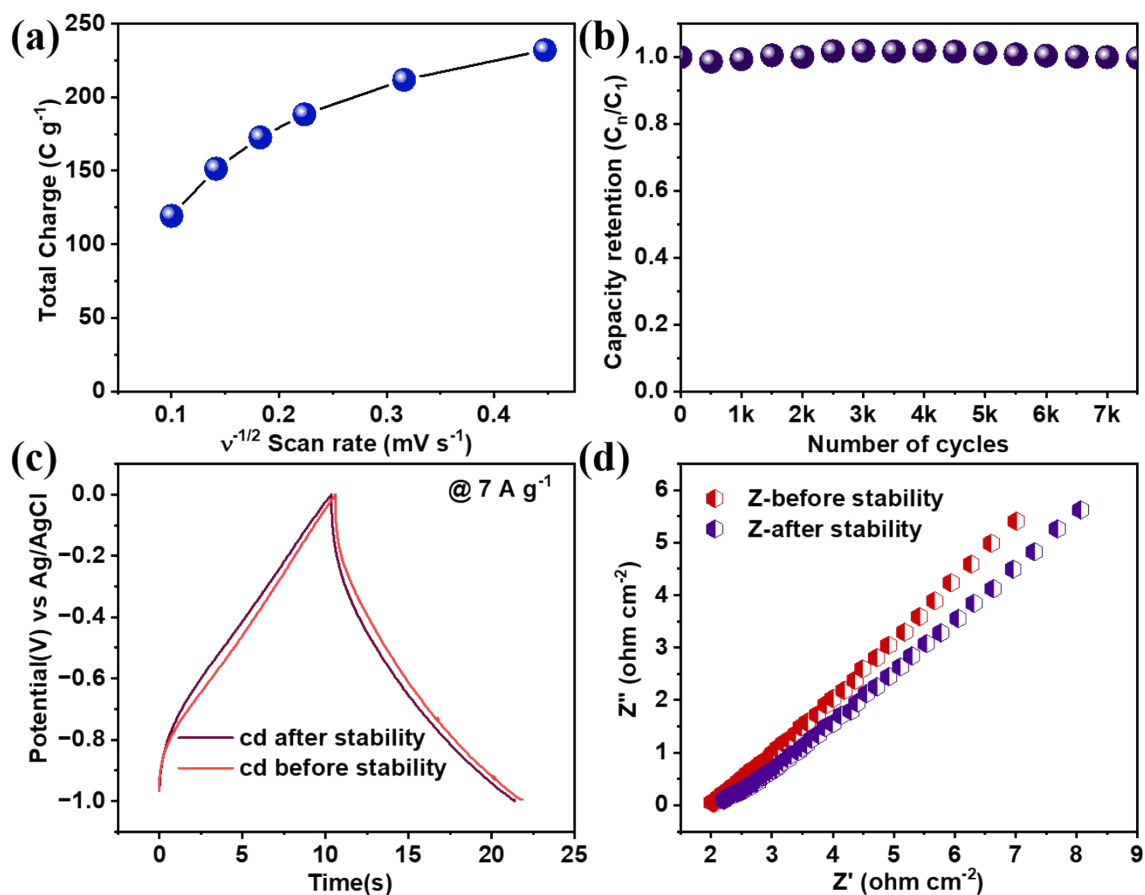

Figure S2: (a) Total charge(Q) vs inverse square root of scan rate  $v^{-1/2}$ , (b) Cyclic stability at  $7 A g^{-1}$ , (c) GCD at  $7 A g^{-1}$  before and after stability, (d) EIS before and after cyclic stability of biochar electrode.

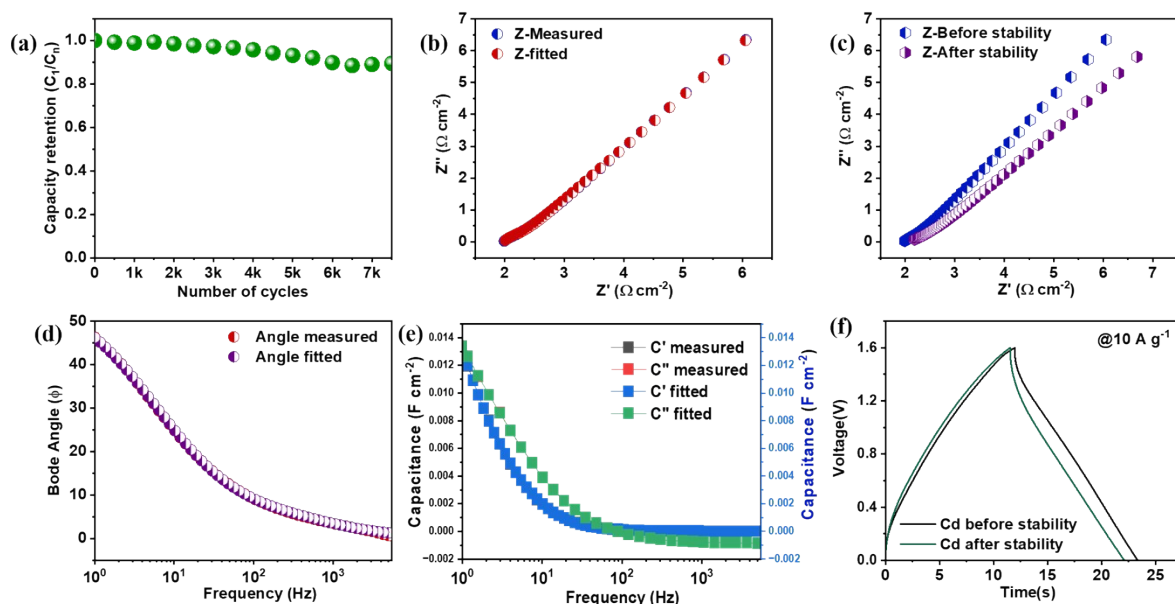

Figure S3: (a) Cyclic stability of ASc device, (b) Nyquist plot of device, (c) EIS of Nyquist plot before and after stability, (d) Bode plot, (e) Capacitance plot and (f) GCD of device at 10 A g<sup>-1</sup> after and before cyclic stability.

different mass loading ratios are taken for measurement for various asymmetric cells.

**Ratio 1:** 0.5 mg of HEO and 1 mg of biochar:

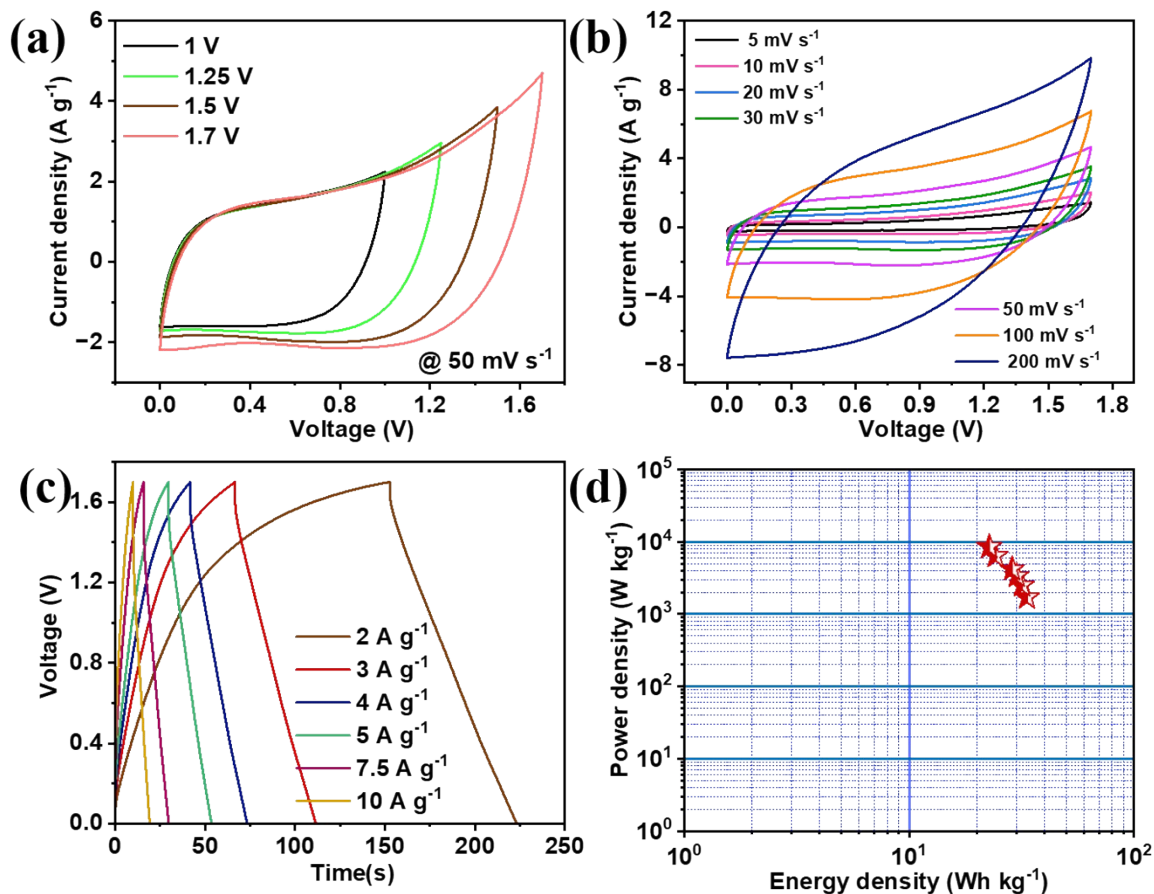

Figure S4: (a) CV stability checked, (b) CV at various scan rate, (c) GCD curves at various current rate, and (d) Ragone plot for asymmetric device.

**Ratio 2:** 1 mg of HEO and 1 mg of biochar:

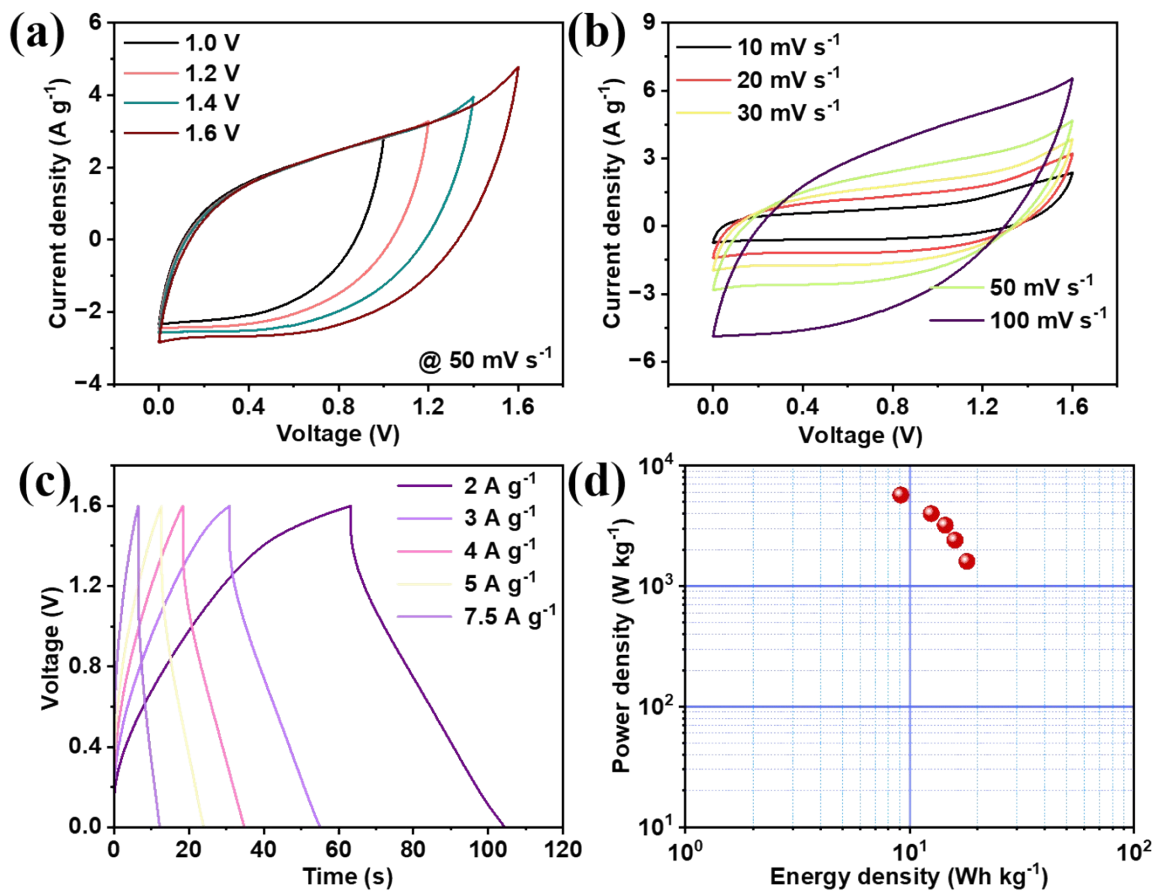

Figure S5: (a) CV stability checked, (b) CV at various scan rate, (c) GCD curves at various current rate, and (d) Ragone plot for asymmetric device.

Ratio 3: 1 mg of HEO and 0.5 mg of biochar:

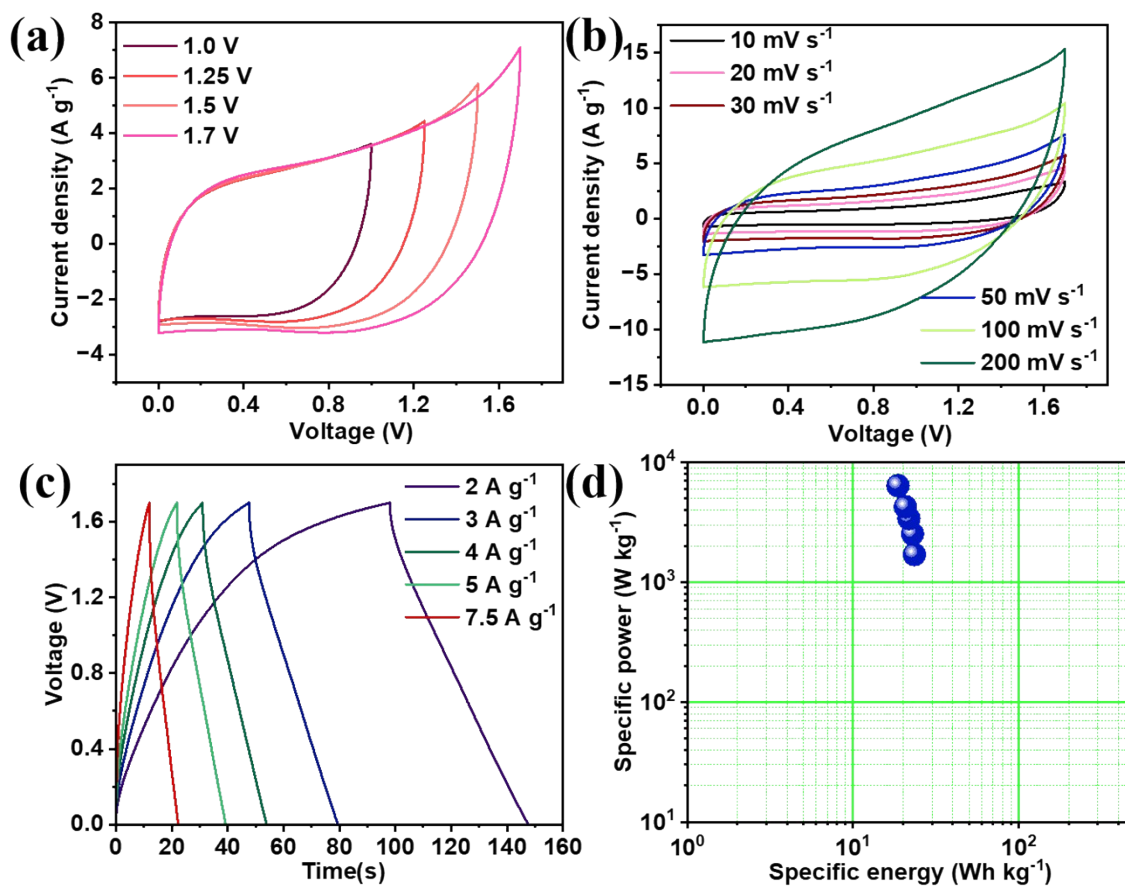

Figure S6: (a) CV stability checked, (b) CV at various scan rate, (c) GCD curves at various current rate, and (d) Ragone plot for asymmetric device.

**Ratio 4:** 0.85 mg of HEO and 1 mg of biochar:

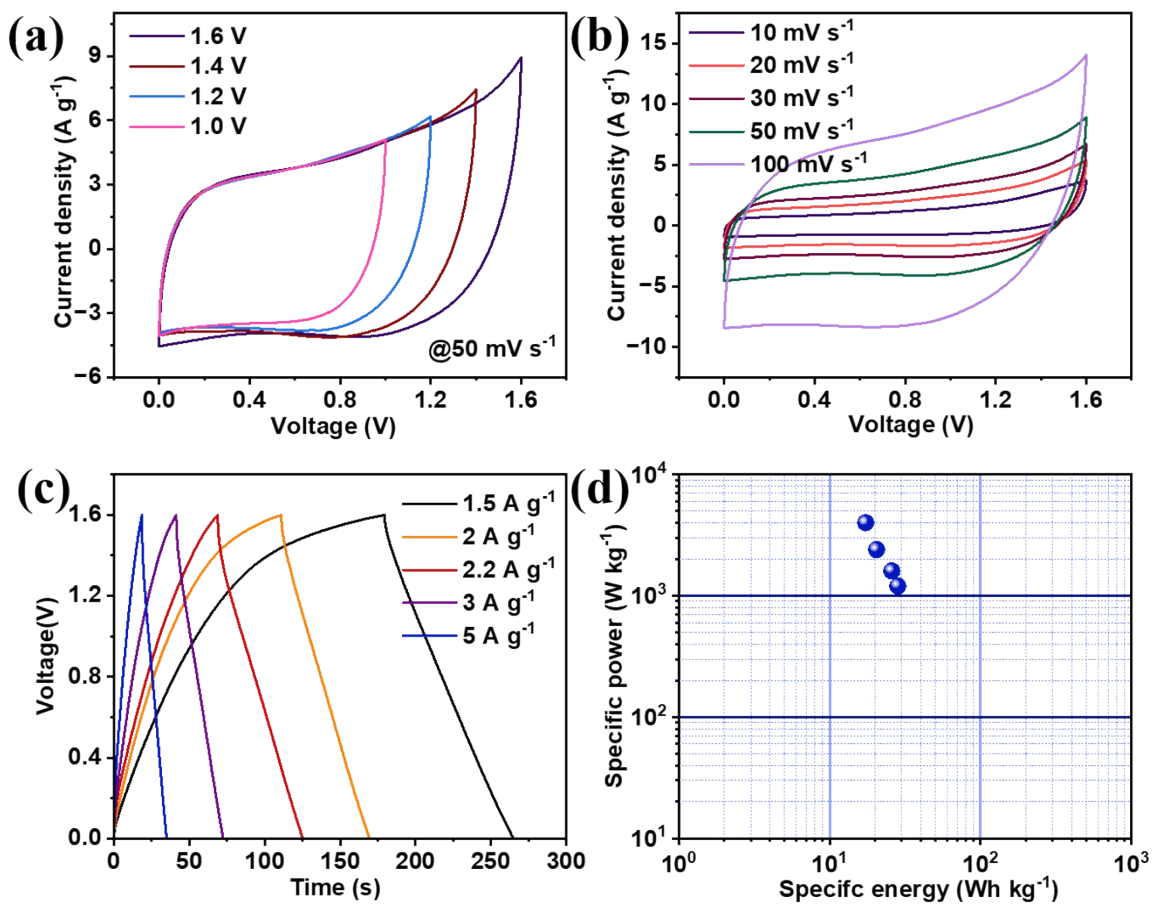

Figure S7: (a) CV stability checked, (b) CV at various scan rate, (c) GCD curves at various current rate, and (d) Ragone plot for asymmetric device.

| Mass loading ratio<br>HEO: Biochar in mg | Specific energy( $\text{Wh kg}^{-1}$ ) | Specific Power( $\text{W kg}^{-1}$ ) |
|------------------------------------------|----------------------------------------|--------------------------------------|
| 0.5 : 1                                  | 33.4                                   | 1700                                 |
| 1 : 1                                    | 17.82                                  | 1600                                 |
| 1 : 0.5                                  | 23.44                                  | 1700                                 |

|          |      |      |
|----------|------|------|
| 0.85 : 1 | 33.4 | 1700 |
|----------|------|------|

Further in depth analyzing the specific energy as well as specific power from reference<sup>1</sup> we can further analyze as follows:

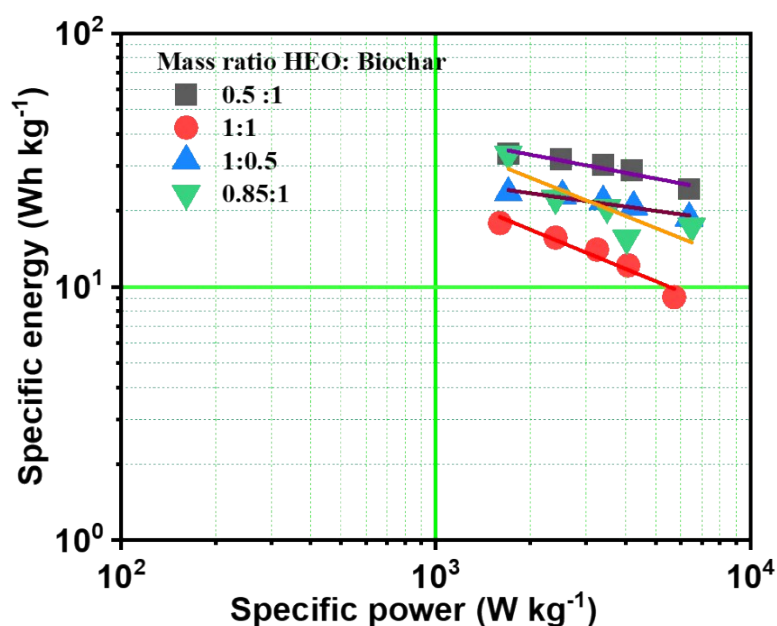

FigureS8: Specific energy vs specific power at different mass loading.

Additionally, specific energy and specific of different misloading are analyzed in detail. For mass ratios, we have analyzed the  $\log(\text{specific energy})$  vs  $\log(\text{specific power})$  plot according to the equation  $\log(\text{specific energy}) = b \log(\text{specific power}) + a$ . For all four types of mass ratio loadings are: 1:0.5, 1:1, 0.5:1, 0.85:1 respectively of HEO and biochar taken. For HEO: Biochar ratio, 1:1, slope -0.51, intercept = 2.91 and  $R^2$  value obtained 0.94, for ratio 0.5:1 we got slope -0.23, intercept = 2.31 and  $R^2$  value obtained 0.92, for the ratio 1: 0.5 we got slope -0.17, intercept = 1.94 and  $R^2$

value obtained 0.93, and for the ratio 0.85: 1 we got slope -0.149, intercept = 1.49 and  $R^2$  value obtained 0.94. Hence as compare to other mass ratio, clearly indicate rate of decrease of energy density with increase of power density is lesser in mass ratio of 0.85:1.

The morphological characterizations by atomic force microscopy (AFM) reveals that the as-prepared NPs are quasi-spherical, with an average size of  $87 \text{ nm} \times 90 \text{ nm}$  (**Figure S9** below).

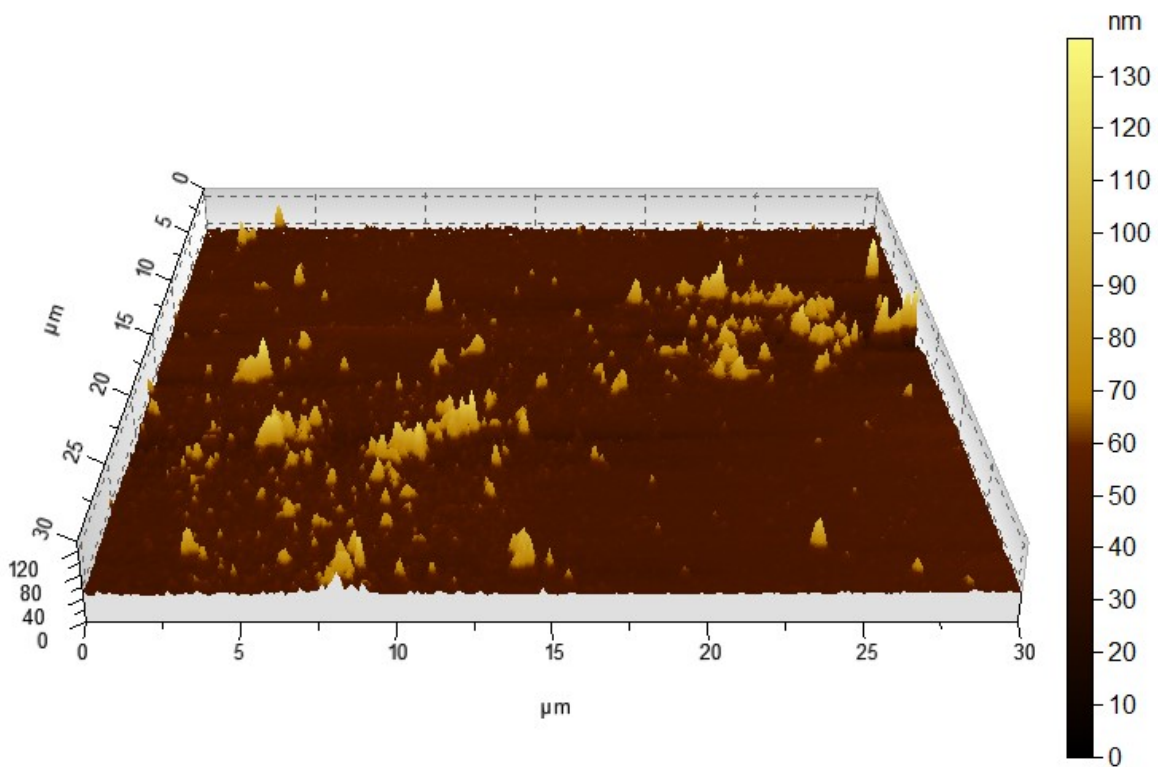



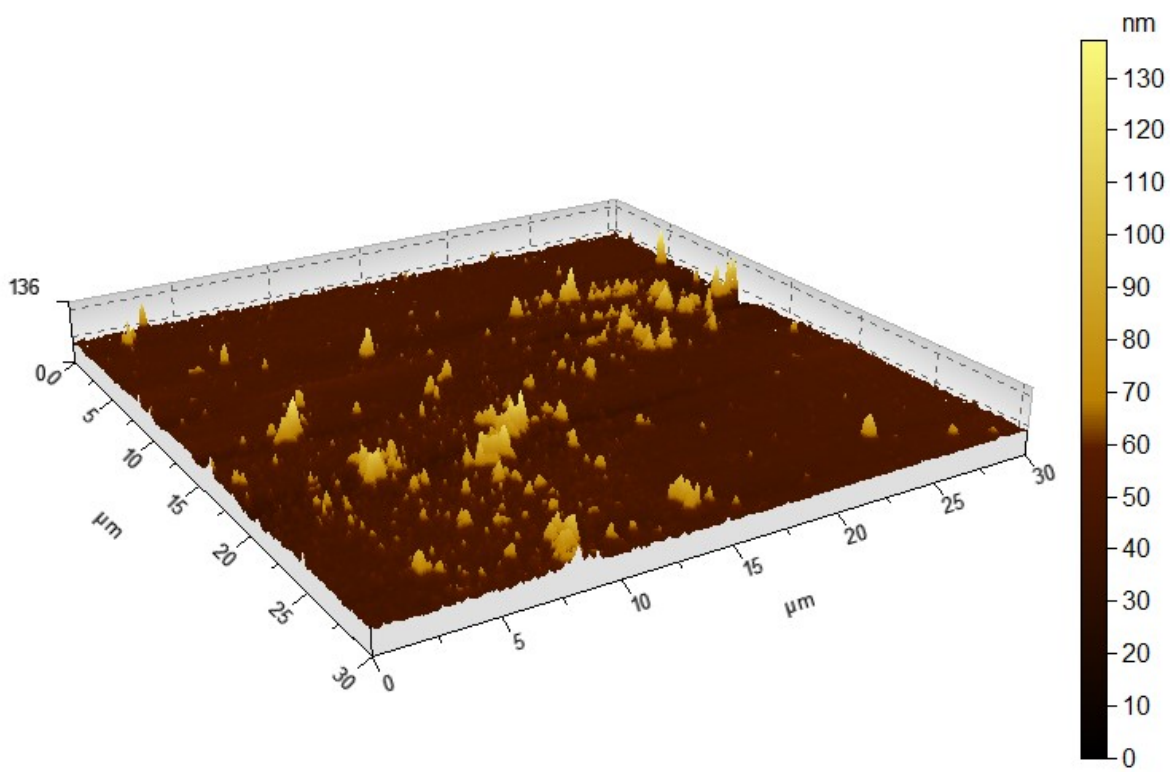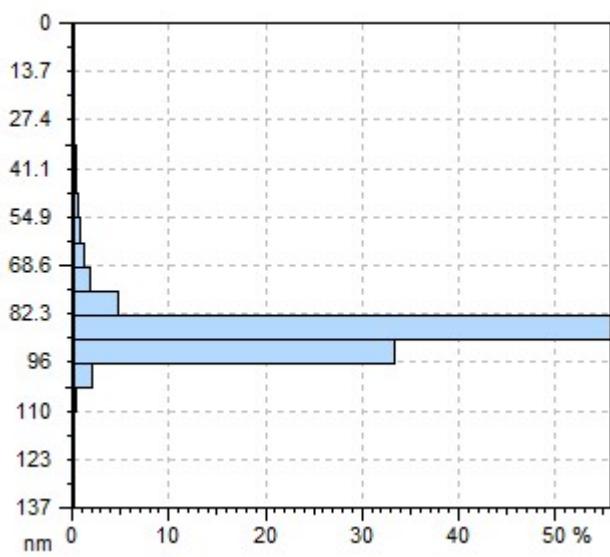

Figure S9: AFM pattern of FCNCM HEO.

| Carbon sources   | Pyrolysis Activation techniques               | Morphology                   | Electrolyte/ Potential Window (V) | Specific capacitance | Cathode// Anode  | Energy Density (Wh/kg) | Power Density (W/kg) | Cyclic stability | Device performance   | Device Electrolyte/ Potential Window(V)          | Ref.         |
|------------------|-----------------------------------------------|------------------------------|-----------------------------------|----------------------|------------------|------------------------|----------------------|------------------|----------------------|--------------------------------------------------|--------------|
| Peanut shells    | Calcined in a furnace 800°C/KOH               | Worm-hole-like pores         | 1M KOH<br>-0.5 to 0.5             | 136F/g @<br>2A/g     | -                | -                      | -                    | -                | -                    | -                                                | <sup>2</sup> |
| wolfberry fruits | Catalytic carbonization/<br>SnCl <sub>2</sub> | Blanket-like rough structure | 6M KOH<br>-1.0 to 0.0             | 365F/g @<br>0.2A/g   | Symmetric device | 23.2                   | 225                  | 96.4%<br>at 10k  | 209 F/g @<br>0.5 A/g | 1M Li <sub>2</sub> SO <sub>4</sub><br>0.0 to 1.8 | <sup>3</sup> |

**Table S1:** Comparison of RS-biochar with various biochar based supercapacitors from agricultural wastage.

|                     |                                |                                      |                        |                       |                  |      |                |                 |                         |                                                  |    |
|---------------------|--------------------------------|--------------------------------------|------------------------|-----------------------|------------------|------|----------------|-----------------|-------------------------|--------------------------------------------------|----|
| Chestnut pulp       | Carbonization/<br>KOH          | pseudo-honeycomb-like 3D network     | 6M KOH<br>-1.0 to 0.0  | 373F/g @<br>0.5A/g    | -                | -    | -              | 99.7%<br>at 10k | -                       | -                                                | 4  |
| Cornstalk           | 800°C<br>Carbonization         | three-dimensional mesh-like pore     | 6M KOH<br>-1.0 to 0.0  | 350.4F/g<br>@0.2A/g   | Symmetric device | 10.1 | 249.9          | 99.8%<br>at 10k | 308 F/g @<br>0.2A/g     | 6M KOH<br>0.0 to 1.0                             | 5  |
| Wheat straw         | Microwave heating<br>500°C/KOH | interconnected macropores            | 6M KOH<br>-1.0 to 0.0  | 325F/g @<br>0.5A/g    | Symmetric device | 21.5 | 7.2<br>kW/kg   | 90.7%<br>at 10k | 268.5F/g<br>@0.5A/g     | PVA/LiCl<br>-0.4 to 0.4                          | 6  |
| Discarded tea waste | 700°C<br>Carbonization         | bulk flakes densely packed structure | 3M KOH<br>-0.8 to 0.3  | 131.95F/g<br>@0.5A/g  | -                | -    | -              | -               | -                       | -                                                | 7  |
| Cherry stones       | 700°C<br>Carbonization         | Large pore structure                 | 6M KOH -<br>1.0 to 0.0 | 370.5 F/g<br>@ 0.5A/g | -                | -    | -              | 99.1%<br>at 5k  | -                       | -                                                | 8  |
| Corn cob waste      | 750°C<br>Carbonization/<br>KOH | Uniform porous structure             | 6M KOH -<br>1.0 to 0.0 | 394.9F/g @<br>1A/g    | -                | 8.9  | 2.502<br>kW/kg | 99% at<br>10k   | -                       | -                                                | 9  |
| Wheat husk          | 800°C<br>Carbonization         | Hollow tunnel's structure            | 6M KOH -<br>1.0 to 0.0 | 271.5F/g @<br>0.5A/g  | -                | -    | -              | 82% at<br>5k    | -                       | -                                                | 10 |
| Rice straw          | 400°C<br>carbonization/<br>KOH | Mesoporous structure                 | 6M KOH<br>-1.0 to 0.0  | 324<br>@0.5A/g        | Symmetric        | 48.9 | 750            | 95% at<br>10k   | -                       | EMI-TFSI<br>(Ionic liquid)                       | 11 |
| Garlic Seeds        | 700°C<br>Carbonization/<br>KOH | Porous honeycomb-like structure      | 6M KOH<br>-1.0 to 0.0  | 268F/g<br>@0.5A/g     | Symmetric        | 31.7 | 500            | 99.2%<br>at 10k | 228.2 F/g at<br>0.5 A/g | 6M KOH<br>1.0 to 0.0                             | 12 |
| Willow Wood         | 800°C<br>Carbonization         | Microporous structure                | 6M KOH<br>-1.0 to 0.0  | 394F/g @<br>1A/g      | Symmetric        | 23   | 10<br>kW/kg    | 94% at<br>5k    | 201 F/g at<br>0.5 A/g   | 1M Na <sub>2</sub> SO <sub>4</sub><br>0.0 to 1.8 | 13 |
| Waste Bagasse       | 700°C<br>Carbonization/        | Porous Structure                     | 6M KOH<br>-1.0 to 0.0  | 455F/g@<br>0.5A/g     | Symmetric        | 22.3 | 220.9          | 93.4%<br>at 10k | 206F/g at<br>0.5A/g     | 1M<br>Na <sub>2</sub> SO <sub>4</sub>            | 14 |

|                            |                                |                                       |                        |                                                   |            |                                     |                                  |                                         |                                                       |                            |               |
|----------------------------|--------------------------------|---------------------------------------|------------------------|---------------------------------------------------|------------|-------------------------------------|----------------------------------|-----------------------------------------|-------------------------------------------------------|----------------------------|---------------|
|                            | KOH                            |                                       |                        |                                                   |            |                                     |                                  |                                         |                                                       | 1.0 to 1.8                 |               |
| Taro epidermis             | 800°C<br>Carbonization/<br>KOH | Cambered sheet structure              | 6M KOH<br>-1.0 to 0.0  | 466 @ 1A/g                                        | Symmetric  | 17.05                               | 50.05                            | 99.8%<br>at 40k                         | 126.6 at<br>0.1A/g                                    | 6M KOH<br>2.0 to 0.0       | <sup>15</sup> |
| Pine nut shells            | 600°C<br>Carbonization/<br>KOH | interconnected carbon nanosheets      | 6 M KOH<br>-1.0 to 0.0 | -                                                 | Symmetric  | 11.9                                | 463.6                            | 94.6%<br>at 2A/g<br>At 10k              | 324F/g at<br>0.05A/g                                  | 6M KOH<br>1.0 to 0.0       | <sup>16</sup> |
| Crab shells and rice husks | 700°C<br>Carbonization/<br>HCl | 3D hierarchically porous structure    | 6 M KOH<br>-1.0 to 0.0 | 474 F/g<br>@0.5A/g                                | Symmetric  | 20.5                                | 4500                             | 95.6%<br>at 20k                         | -                                                     | 1M<br>Na2SO4<br>1.0 to 1.8 | <sup>17</sup> |
| Bean dregs                 | 500°C<br>Carbonization/<br>KOH | Porous Structure                      | 6 M KOH<br>-1.0 to 0.0 | 197 F/g<br>@0.3 A/g                               | Symmetric  | 18.43<br>$\mu\text{Wh}/\text{cm}^2$ | 120<br>$\mu\text{W}/\text{cm}^2$ | 86% at<br>2.5k                          | 207 mF/cm <sup>2</sup><br>at<br>0.3mA/cm <sup>2</sup> | PVA-KOH<br>0.0 to 0.8      | <sup>18</sup> |
| Pomelo seed                | 700°C<br>Carbonization/<br>KOH | Interconnected quasi-spherical carbon |                        | 845 F/g @<br>1A/g                                 |            |                                     |                                  | 93.8%<br>at 10k<br>@10A/g               |                                                       |                            | <sup>19</sup> |
| Rice straw                 | 600°C<br>carbonization         | 2D graphitic structure                | 3M KOH<br>-1.0 to 0.0. | 121.5 F g <sup>-1</sup><br>at 1 A g <sup>-1</sup> | Asymmetric | 33.4                                | 1700                             | 90% at<br>7.5k @<br>5 A g <sup>-1</sup> | 83 F g <sup>-1</sup> at 2<br>A g <sup>-1</sup>        | 3M aqueous<br>KOH          | This work     |

Reference:

- (1) Basak, U.; Das, A.; Maity, S.; Chatterjee, D. P.; Nandi, A. K. Polyaniline-(Dinonylnaphthyl Disulphonic Acid) Hydrogel Showing Enhanced Supercapacitor and Photo-Current Performance by in Situ Growth of AgNPs. *Colloids Surfaces A Physicochem. Eng. Asp.* **2024**, *685*, 133193. <https://doi.org/10.1016/j.colsurfa.2024.133193>.

- (2) Nguyen, N. T.; Le, P. A.; Phung, V. B. T. Biomass-Derived Carbon Hooks on Ni Foam with Free Binder for High Performance Supercapacitor Electrode. *Chem. Eng. Sci.* **2021**, *229*. <https://doi.org/10.1016/j.ces.2020.116053>.
- (3) Xu, X.; Sielicki, K.; Min, J.; Li, J.; Hao, C.; Wen, X.; Chen, X.; Mijowska, E. One-Step Converting Biowaste Wolfberry Fruits into Hierarchical Porous Carbon and Its Application for High-Performance Supercapacitors. *Renew. Energy* **2022**, *185*, 187–195. <https://doi.org/10.1016/j.renene.2021.12.040>.
- (4) Zhang, D.; Sun, L.; Liu, Q.; Sun, H.; Wang, Q.; Li, W.; Li, Z.; Wang, B. Ultra-High Specific Surface Area Porous Carbon Derived from Chestnut for High-Performance Supercapacitor. *Biomass and Bioenergy* **2021**, *153* (July), 106227. <https://doi.org/10.1016/j.biombioe.2021.106227>.
- (5) Yue, X.; Yang, H.; Cao, Y.; Jiang, L.; Li, H.; Shi, F.; Liu, J. Nitrogen-Doped Cornstalk-Based Biomass Porous Carbon with Uniform Hierarchical Pores for High-Performance Symmetric Supercapacitors. *J. Mater. Sci.* **2022**, *57* (5), 3645–3661. <https://doi.org/10.1007/s10853-022-06891-9>.
- (6) Chen, W.; Wang, X.; Liu, C.; Luo, M.; Yang, P.; Zhou, X. Rapid Single-Step Synthesis of Porous Carbon from an Agricultural Waste for Energy Storage Application. *Waste Manag.* **2020**, *102*, 330–339. <https://doi.org/10.1016/j.wasman.2019.10.058>.
- (7) Thirumal, V.; Yuvakkumar, R.; Ravi, G.; Dineshkumar, G.; Ganesan, M.; Alotaibi, S. H.; Velauthapillai, D. Characterization of Activated Biomass Carbon from Tea Leaf for Supercapacitor Applications. *Chemosphere* **2022**, *291* (P2), 132931. <https://doi.org/10.1016/j.chemosphere.2021.132931>.

- (8) Zhang, J.; Chen, H.; Ma, Z.; Li, H.; Dong, Y.; Yang, H.; Yang, L.; Bai, L.; Wei, D.; Wang, W. A Lignin Dissolution-Precipitation Strategy for Porous Biomass Carbon Materials Derived from Cherry Stones with Excellent Capacitance. *J. Alloys Compd.* **2020**, *832*, 155029. <https://doi.org/10.1016/j.jallcom.2020.155029>.
- (9) Xu, M.; Huang, Q.; Lu, J.; Niu, J. Green Synthesis of High-Performance Supercapacitor Electrode Materials from Agricultural Corncob Waste by Mild Potassium Hydroxide Soaking and a One-Step Carbonization. *Ind. Crops Prod.* **2021**, *161* (July 2020), 113215. <https://doi.org/10.1016/j.indcrop.2020.113215>.
- (10) Baig, M. M.; Gul, I. H. Conversion of Wheat Husk to High Surface Area Activated Carbon for Energy Storage in High-Performance Supercapacitors. *Biomass and Bioenergy* **2021**, *144* (July 2020), 105909. <https://doi.org/10.1016/j.biombioe.2020.105909>.
- (11) Charoensook, K.; Huang, C.-L.; Tai, H.-C.; Lanjapalli, V. V. K.; Chiang, L.-M.; Hosseini, S.; Lin, Y.-T.; Li, Y.-Y. Preparation of Porous Nitrogen-Doped Activated Carbon Derived from Rice Straw for High-Performance Supercapacitor Application. *J. Taiwan Inst. Chem. Eng.* **2021**, *120*, 246–256. <https://doi.org/10.1016/j.jtice.2021.02.021>.
- (12) Li, S.; Chen, Q.; Gong, Y.; Wang, H.; Li, D.; Zhang, Y.; Fu, Q.; Pan, C. “One-Step” Carbonization Activation of Garlic Seeds for Honeycomb-like Hierarchical Porous Carbon and Its High Supercapacitor Properties. *ACS Omega* **2020**, *5* (46), 29913–29921. <https://doi.org/10.1021/acsomega.0c04190>.
- (13) Phiri, J.; Dou, J.; Vuorinen, T.; Gane, P. A. C.; Maloney, T. C. Highly Porous Willow Wood-Derived Activated Carbon for High-Performance Supercapacitor Electrodes. *ACS Omega* **2019**, *4* (19), 18108–18117. <https://doi.org/10.1021/acsomega.9b01977>.

- (14) Yu, P.; Liang, Y.; Dong, H.; Hu, H.; Liu, S.; Peng, L.; Zheng, M.; Xiao, Y.; Liu, Y. Rational Synthesis of Highly Porous Carbon from Waste Bagasse for Advanced Supercapacitor Application. *ACS Sustain. Chem. Eng.* **2018**, *6* (11), 15325–15332. <https://doi.org/10.1021/acssuschemeng.8b03763>.
- (15) Chen, X.; Chi, M.; Xing, L.; Xie, X.; Liu, S.; Liang, Y.; Zheng, M.; Hu, H.; Dong, H.; Liu, Y.; Jiang, S. P.; Xiao, Y. Natural Plant Template-Derived Cellular Framework Porous Carbon as a High-Rate and Long-Life Electrode Material for Energy Storage. *ACS Sustain. Chem. Eng.* **2019**, *7* (6), 5845–5855. <https://doi.org/10.1021/acssuschemeng.8b05777>.
- (16) Guan, L.; Pan, L.; Peng, T.; Gao, C.; Zhao, W.; Yang, Z.; Hu, H.; Wu, M. Synthesis of Biomass-Derived Nitrogen-Doped Porous Carbon Nanosheets for High-Performance Supercapacitors. *ACS Sustain. Chem. Eng.* **2019**, *7* (9), 8405–8412. <https://doi.org/10.1021/acssuschemeng.9b00050>.
- (17) Peng, L.; Liang, Y.; Huang, J.; Xing, L.; Hu, H.; Xiao, Y.; Dong, H.; Liu, Y.; Zheng, M. Mixed-Biomass Wastes Derived Hierarchically Porous Carbons for High-Performance Electrochemical Energy Storage. *ACS Sustain. Chem. Eng.* **2019**, *7* (12), 10393–10402. <https://doi.org/10.1021/acssuschemeng.9b00477>.
- (18) Chen, F.; Ji, Y.; Deng, Y.; Ren, F.; Tan, S.; Wang, Z. Ultrasonic-Assisted Fabrication of Porous Carbon Materials Derived from Agricultural Waste for Solid-State Supercapacitors. *J. Mater. Sci.* **2020**, *55* (25), 11512–11523. <https://doi.org/10.1007/s10853-020-04751-y>.
- (19) Yin, Z.; Xu, Y.; Wu, J.; Huang, J. Effect of Pomelo Seed-Derived Carbon on the

Performance of Supercapacitors. *Nanoscale Adv.* **2021**, 3 (7), 2007–2016.

<https://doi.org/10.1039/d0na00778a>.
